# Supplementary material for: New Hg(ii) coordination polymers based on a thioimidazole ligand with good performance to detoxify Hg(ii) and reversibly capture iodine
Source: Royal Society of Chemistry journal article supplement (doi:10.1039/d2dt03057h), 2022-12-12
Supplement: d2dt03057h1.pdf [file d2dt03057h1.pdf]

## Supplementary Information

### **New Hg(II) coordination polymers based on a thioimidazole ligand with good performance to detoxify Hg(II) and reversibly capture iodine**

Maryam Bahrani-Pour<sup>a</sup>, Azizolla Beheshti<sup>\*a</sup>, Tahereh Sedaghat<sup>a</sup>, Elham Hoveizi<sup>b</sup>, Nadieh Naseri<sup>a</sup>, Peter Mayer<sup>c</sup>, Roberto Centore<sup>d</sup>

<sup>a</sup> Department of Chemistry, Faculty of Science, Shahid Chamran University of Ahvaz, 6135783151 Ahvaz, Iran

<sup>b</sup> Department of Biology, Faculty of Science, Shahid Chamran University of Ahvaz, 6135783151 Ahvaz, Iran

<sup>c</sup> Department of Chemie Butenandtstr, LMU München University, 5-13 (D) 81377 München, Germany.

<sup>d</sup> Department of Chemical Sciences, University of Naples Federico II, Via Cintia, I-80126 Naples, Italy

\*E-mail: [a.beheshti@scu.ac.ir](mailto:a.beheshti@scu.ac.ir);

Correspondence to: Azizolla Beheshti, Chemistry Department, Faculty of Sciences, Shahid Chamran University of Ahvaz, Ahvaz, Iran. E-mail: [a.beheshti@scu.ac.ir](mailto:a.beheshti@scu.ac.ir), Tel: +98 61 33331042; Fax: +98 61 33331042

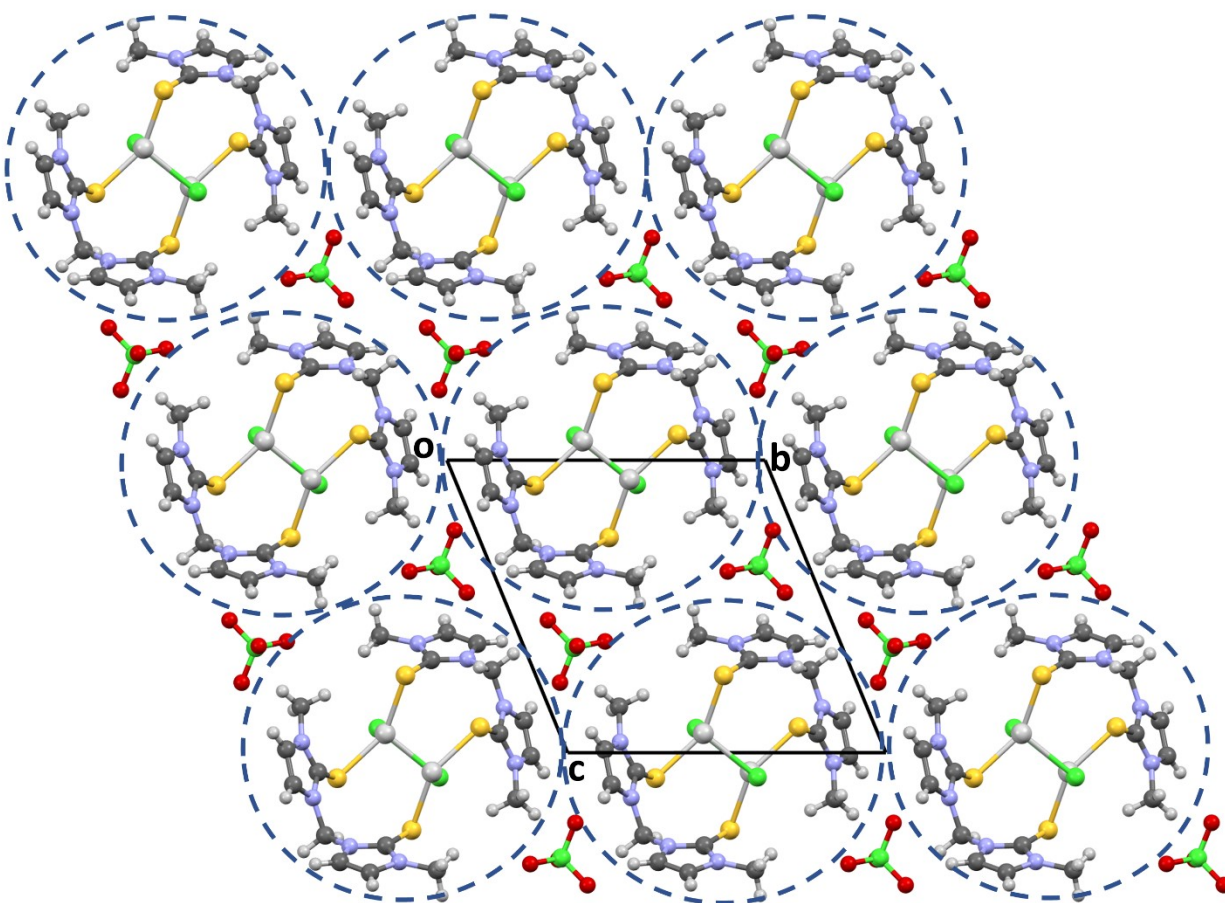

**Figure S1:** Packing of **2** viewed down *a*. Columnar chains are enclosed in dashed circles.

### Search in CSD

We have searched in the Cambridge Structural Database, CSD version 5.43 updates (Jun 2022), for crystal structures of chlorocomplexes of Hg(II) with cyclic thioamides. The details of the search are shown in Figure S2.

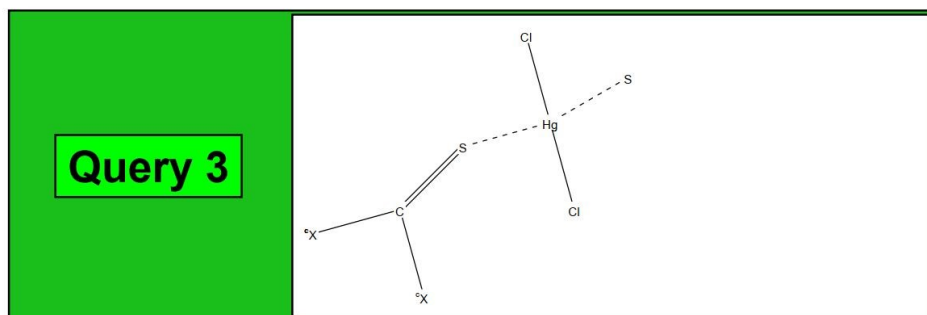

**Figure S2:** The structures searched in the CSD.  $\text{X}$  is any atom belonging to a cycle.

The only filter applied was “3D coordinates determined”. A total of 20 hits were found, whose refcodes are: BAPWAQ, BOPGOF, DEHWUL, DEJCUT, FUGXUD, FUYWON, FUZKET, KOXRAS, LOWGIP, MARRAY, NAKGOX, NAQQOL, NUYVIP, OKOWUG, RADZUV, RIMLEH, VEZYAC, VIGBUL, WODCUN, ZAWXUS. In the search we have also determined the distances Hg-S in all the structures. The histogram of the distances is reported below.

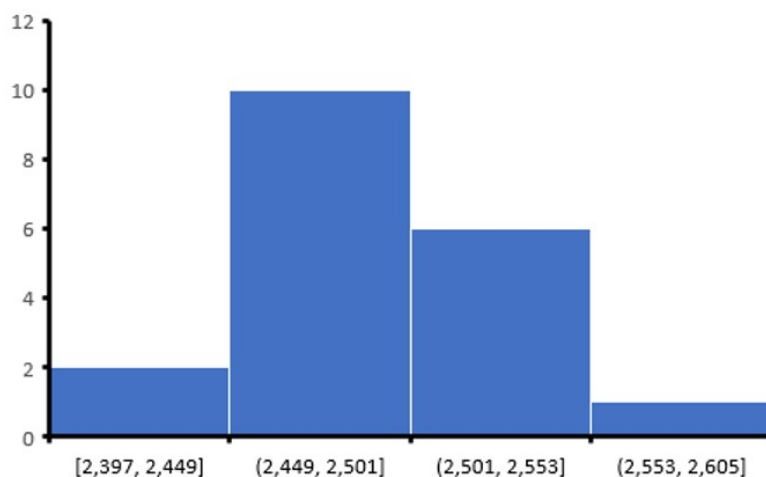

**Figure S3:** Histogram of the distances Hg-S in the 20 structures of the query of Figure S2.

We have also searched for thiocyanate complexes of Hg(II). In this case, only two hits were found, with CSD refcodes VITLES and WODDIC.

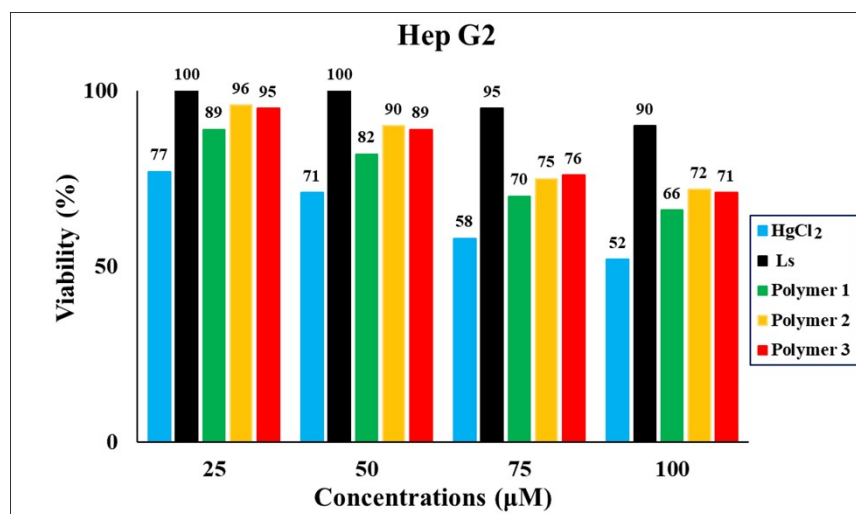

**Figure S4:** Evaluation of cell viability on treated HepG2 cells with HgCl<sub>2</sub>, free ligand and polymers 1-3 with concentrations of 25, 50, 75, and 100 μM by MTT assay.

**Table S1:** Evaluation of cell viability on treated HepG2 cells with HgCl<sub>2</sub>, free ligand, co-anions salts, and polymers **1-3** with concentrations of 25, 50, 75, and 100 μM by MTT assay, and IC50 values.

| Concentration | HgCl <sub>2</sub> | Ls  | NaBF <sub>4</sub> | NaClO <sub>4</sub> | KSCN   | Polymer 1 | Polymer 2 | Polymer 3 |
|---------------|-------------------|-----|-------------------|--------------------|--------|-----------|-----------|-----------|
| 100 μM        | 52                | 90  | 80                | 92                 | 97     | 66        | 72        | 71        |
| 75 μM         | 58                | 95  | 88                | 96                 | 99     | 70        | 75        | 76        |
| 50 μM         | 71                | 100 | 94                | 100                | 100    | 82        | 90        | 89        |
| 25 μM         | 77                | 100 | 100               | 100                | 100    | 89        | 96        | 95        |
| IC 50         | 102.5             | 357 | 214.92            | 436.6              | 1083.5 | 142.4     | 152.29    | 155.87    |

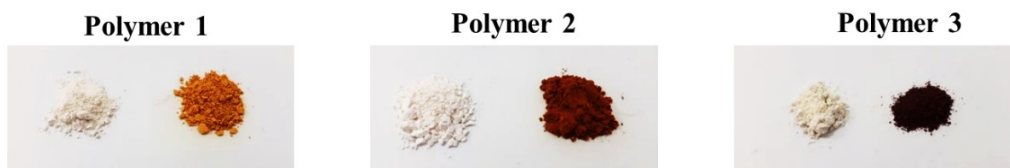

**Figure S5:** The precipitate of Hg-SCPs before and after iodine adsorption.

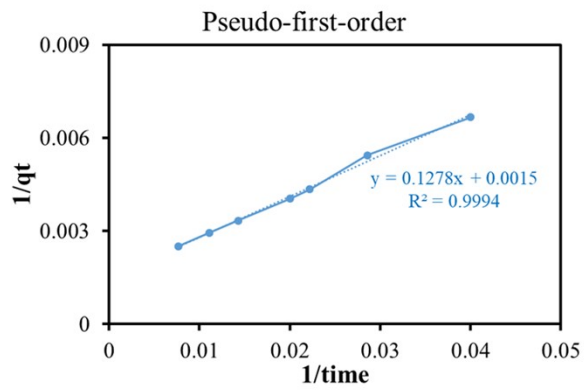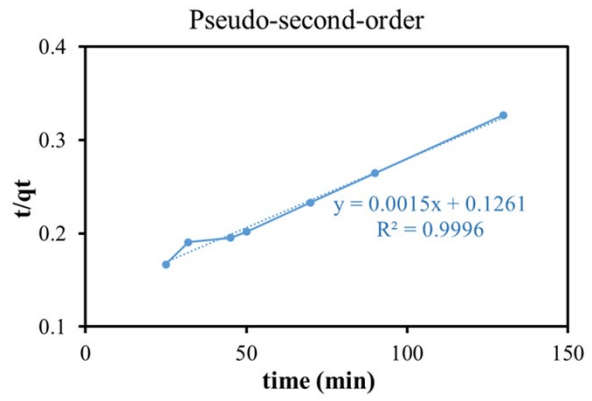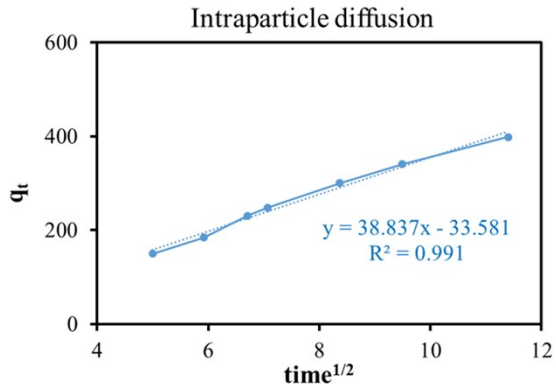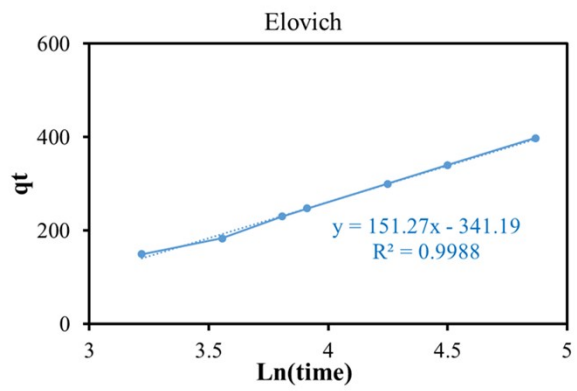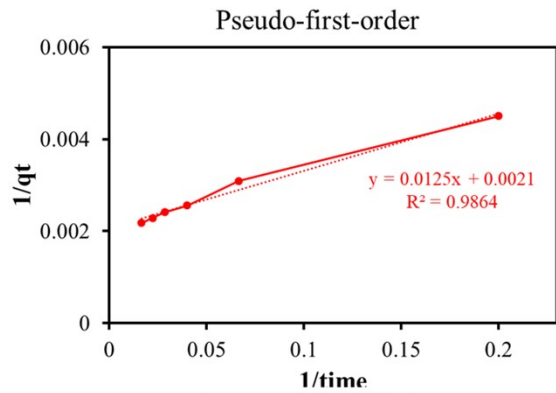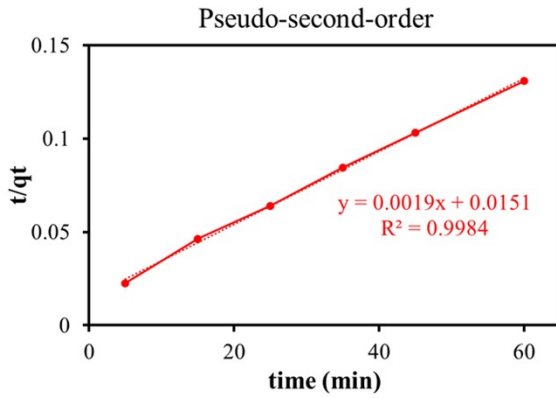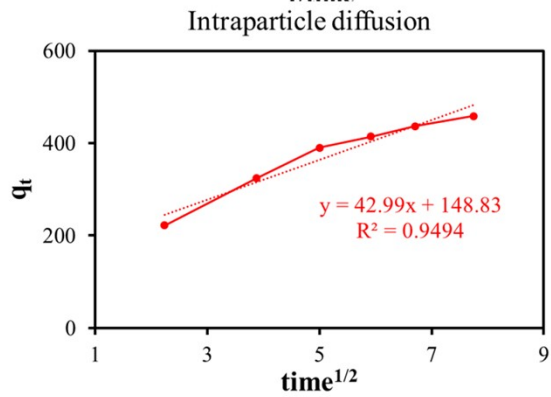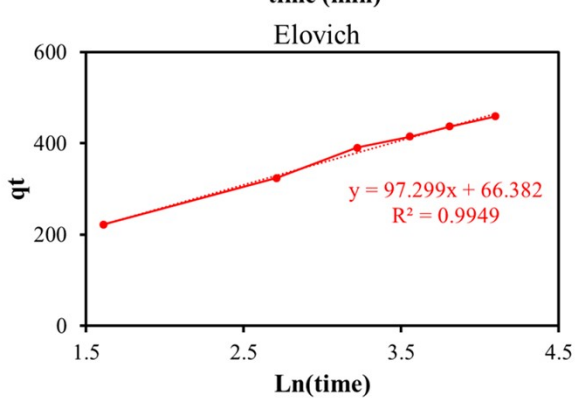

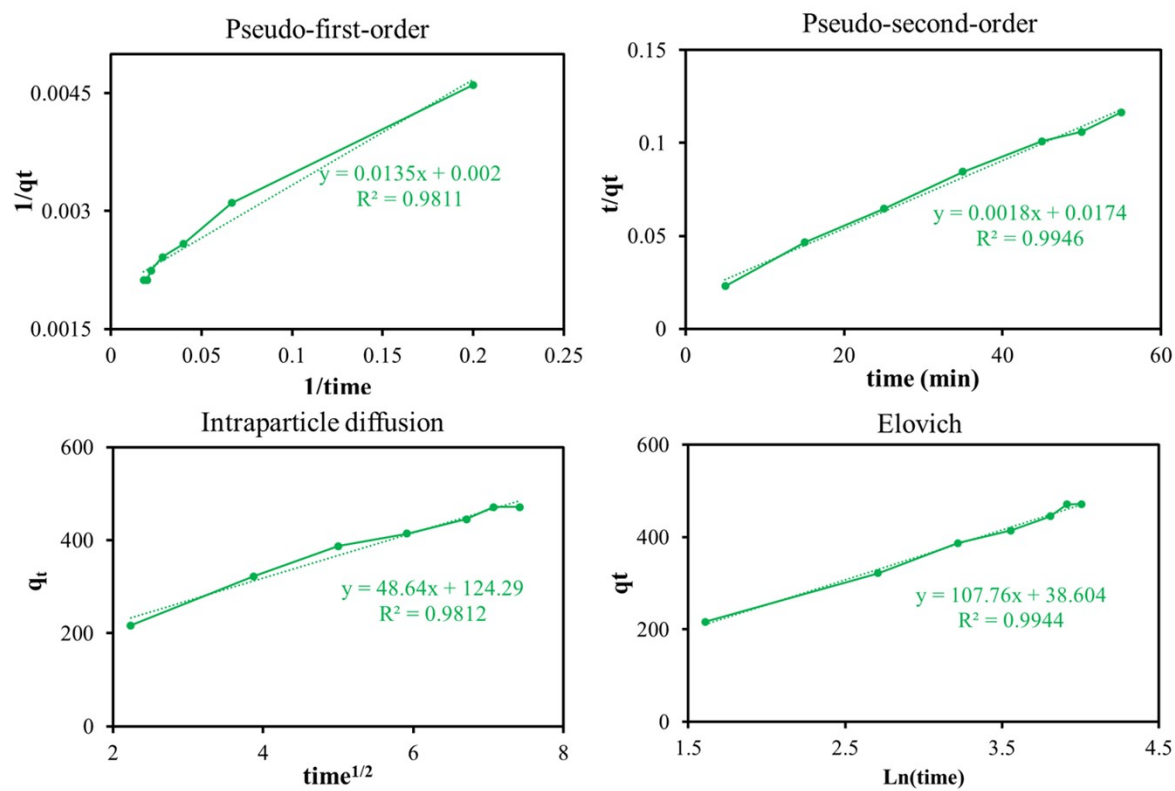

**Fig**

**ure S6:** The pseudo-first-order, pseudo-second-order, intraparticle diffusion, and Elovich models for the uptake of I<sub>2</sub> by polymers **1-3** at 0.005 M concentration of solution (**Polymer 1: blue, Polymer 2: red, Polymer 3: green**).

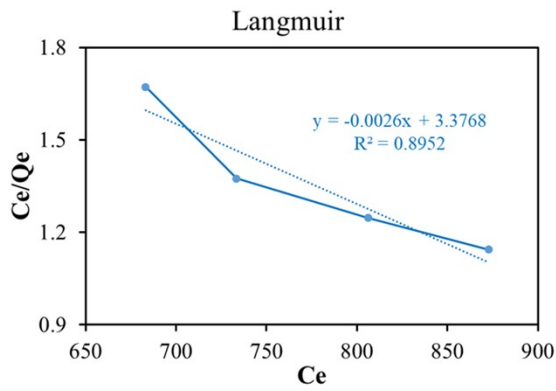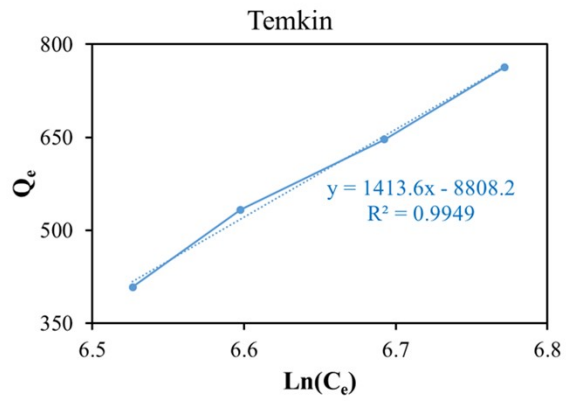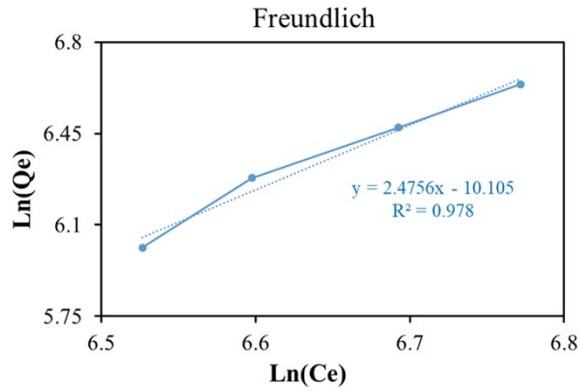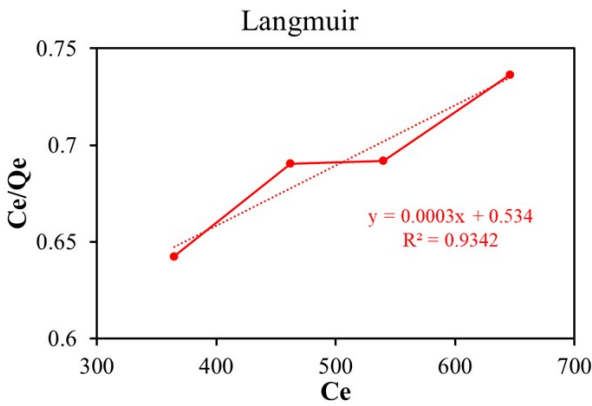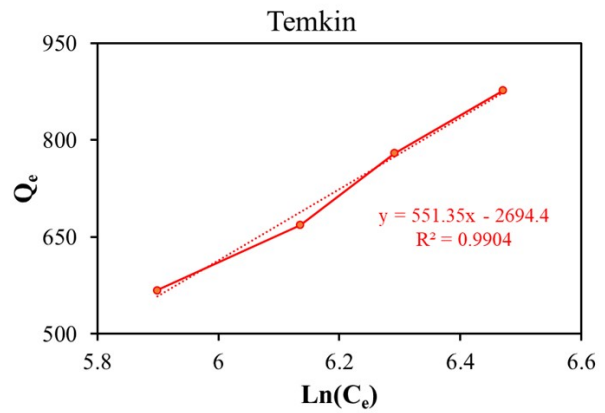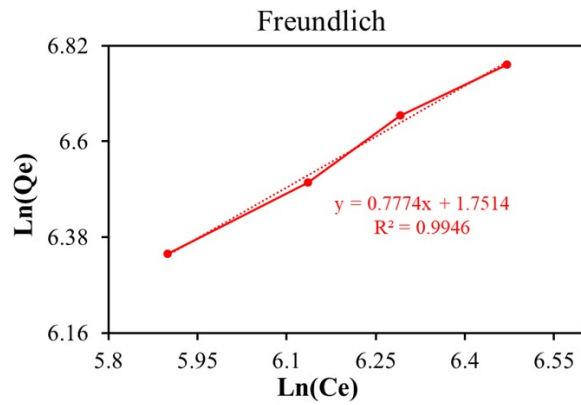

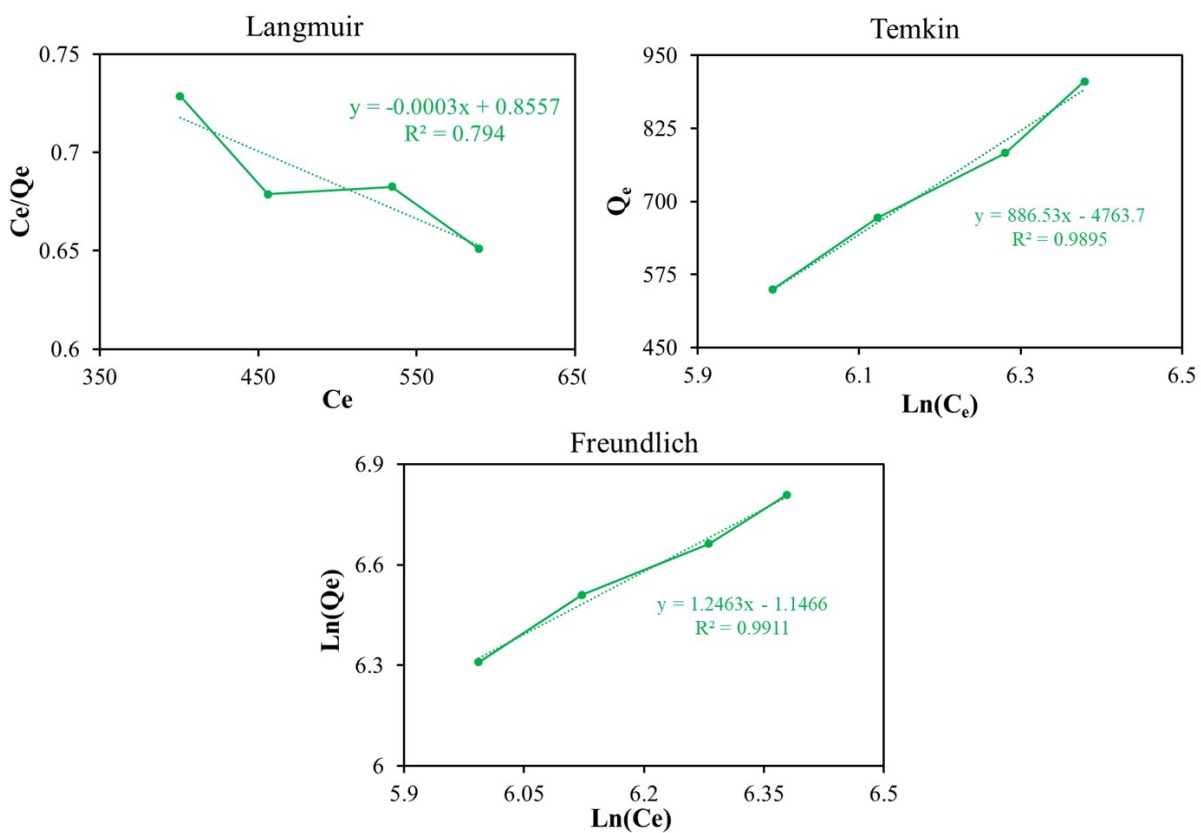

**Figure S7:** The Langmuir, Temkin, and Freundlich isotherm models for polymers 1-3 (**Polymer 1: blue, Polymer 2: red, Polymer 3: green**).



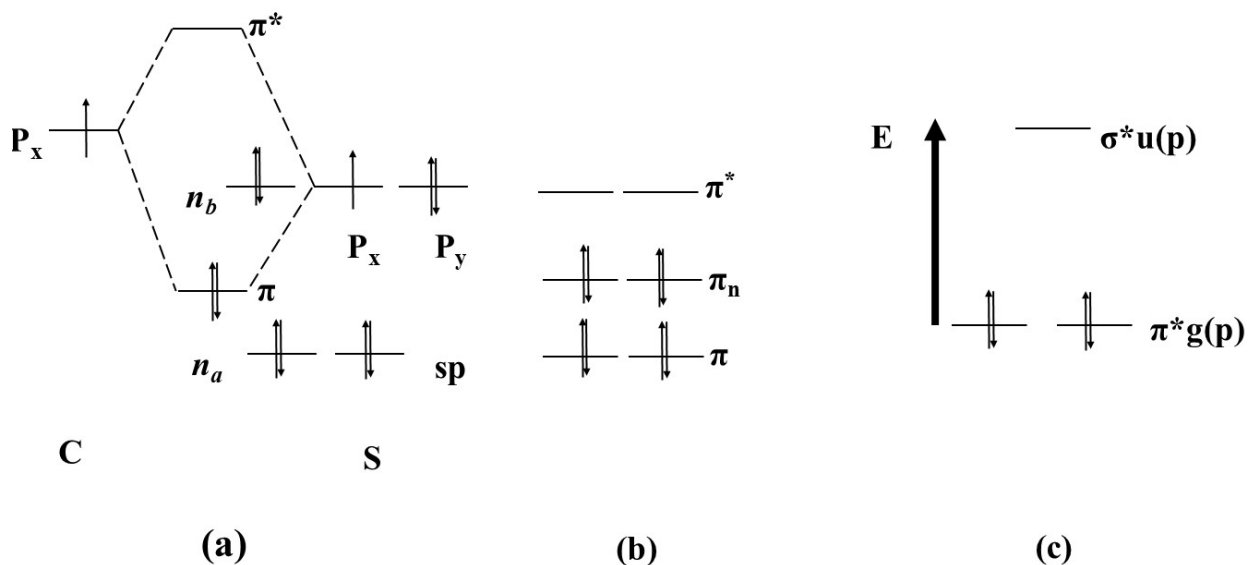

**Figure S8:** Simplified molecular orbital diagram of (a)  $\text{C}=\text{S}$  bond as a Lewis base, (b)  $\text{NCS}^-$  as a Lewis base, and (c)  $\text{I}_2$  as a Lewis acid.

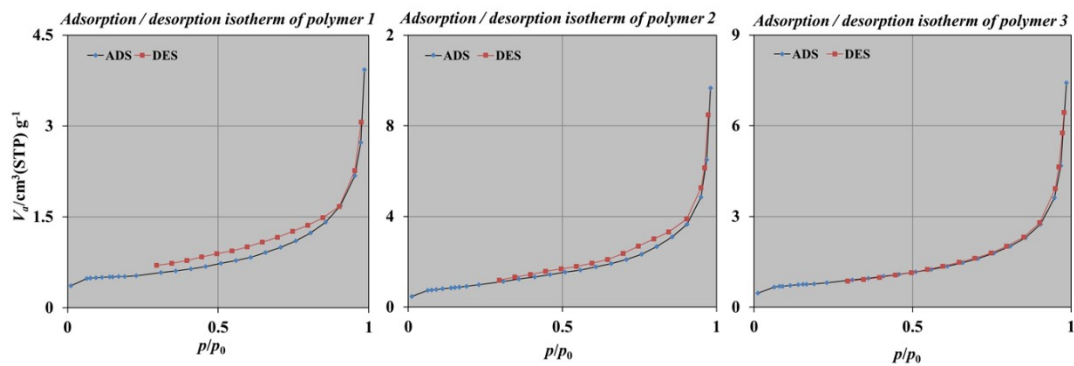

**Figure S9:** Nitrogen adsorption/ desorption isotherms at 77K of Hg-SCPs.

**Table S2.** The  $\text{N}_2$  adsorption-desorption isotherm data of the synthesized Hg-SCPs polymers.

| Data                                                | Polymer 1 | Polymer 2 | Polymer 3 |                                             |
|-----------------------------------------------------|-----------|-----------|-----------|---------------------------------------------|
| $V_m$                                               | 0.4577    | 0.6491    | 0.723     | [ $\text{cm}^3(\text{STP}) \text{g}^{-1}$ ] |
| $a_s, \text{BET}$                                   | 1.9922    | 2.8251    | 3.1468    | [ $\text{m}^2 \text{g}^{-1}$ ]              |
| $C$                                                 | 447.3     | 365.34    | 248.36    |                                             |
| <b>Total pore volume (<math>p/p_0=0.985</math>)</b> | 0.0060812 | 0.011473  | 0.014968  | [ $\text{cm}^3 \text{g}^{-1}$ ]             |
| <b>Average pore diameter</b>                        | 12.21     | 16.244    | 19.027    | [nm]                                        |
